# Supplementary material for: Micro-wheels composed of self-assembled tungsten oxide nanorods for highly sensitive detection of low level toxic chlorine gas
Source: Royal Society of Chemistry journal article supplement (doi:10.1039/c5ra00916b), 2015-01-01

## **Micro-wheels Composed of Self-Assembled Tungsten Oxide Nanorods for Highly Sensitive Detection of Low Level Toxic Chlorine Gas**

**Pham Van Tong<sup>1,2</sup>, Nguyen Van Duy<sup>1</sup>, Nguyen Duc Hoa<sup>1\*</sup>, Nguyen Van Hieu<sup>1\*</sup>**

<sup>1</sup>International Training Institute for Materials Science (ITIMS), Hanoi University of Science and Technology (HUST), Dai Co Viet, Hanoi, Vietnam

<sup>2</sup>Department of Physics, Faculty of Mechanical Engineering, National University of Civil Engineering (NUCE), No. 55, Giai Phong Str., Hanoi, Viet Nam

**Figure S1.** Apparatus for gas sensor testing. The black chamber ensures the gas-sensing measurements were not influenced by light.

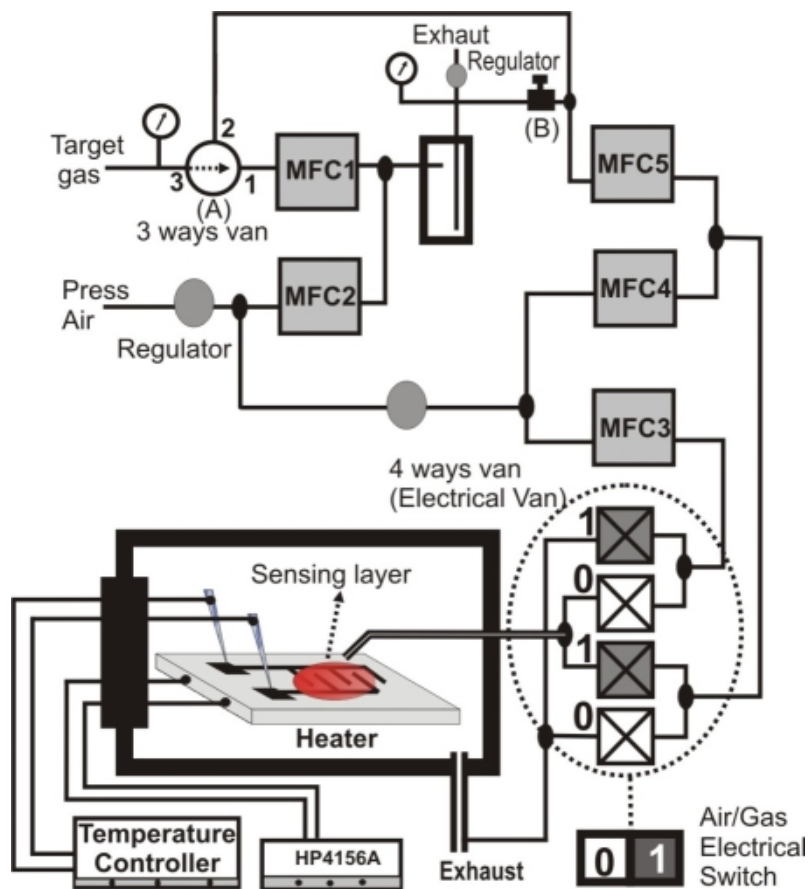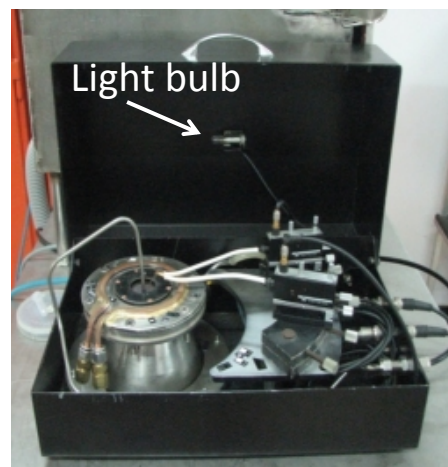

Photo of the black-box chamber for sensing measurement

**Figure S2.** SEM images of the products obtained by different experiments under a fixed hydrothermal condition.

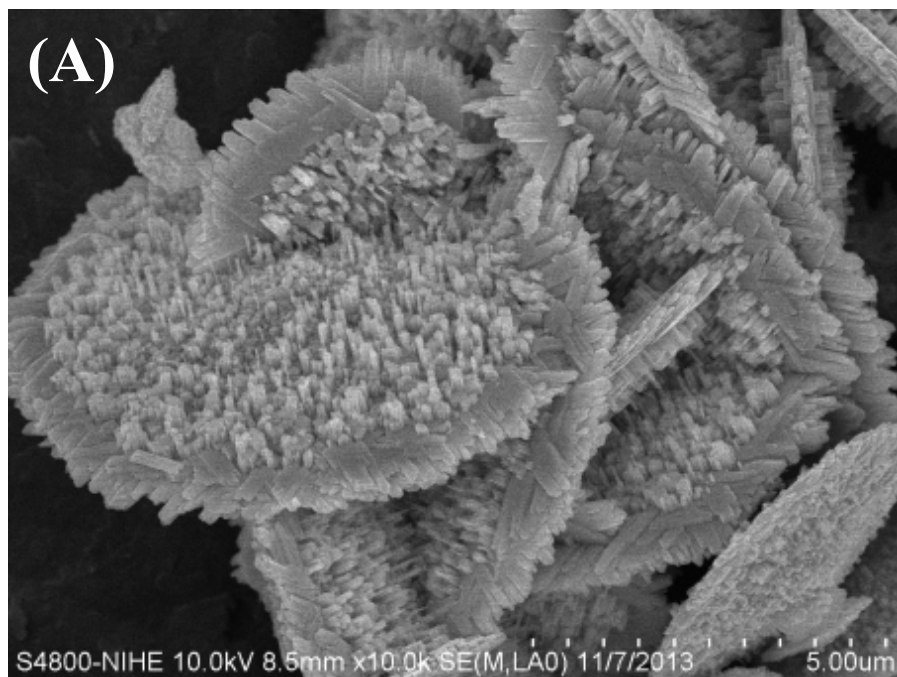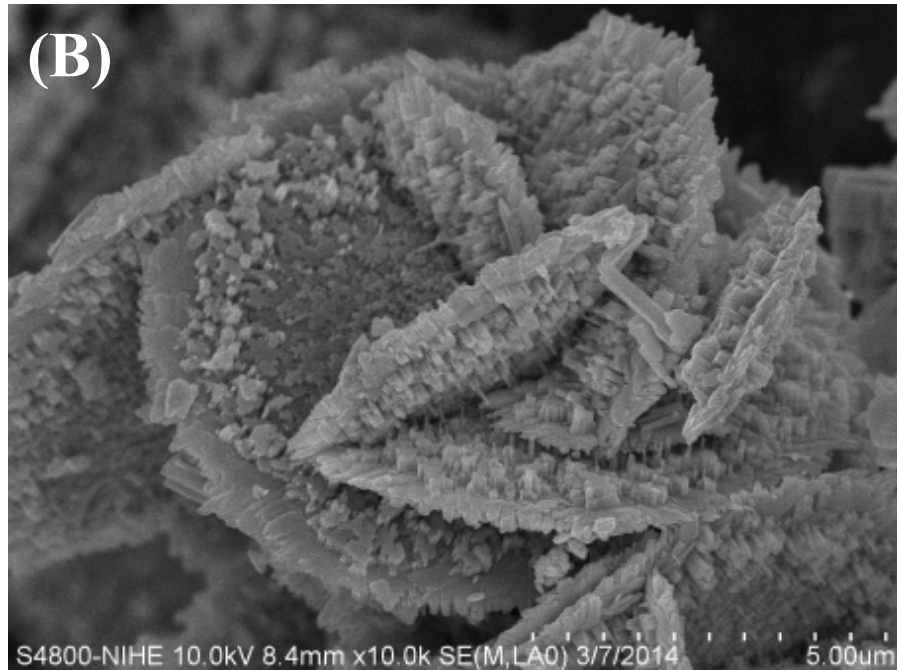

**Figure S3.** XRD pattern of the synthesized of the micro-wheels made of self-assembled tungsten oxide nanorods

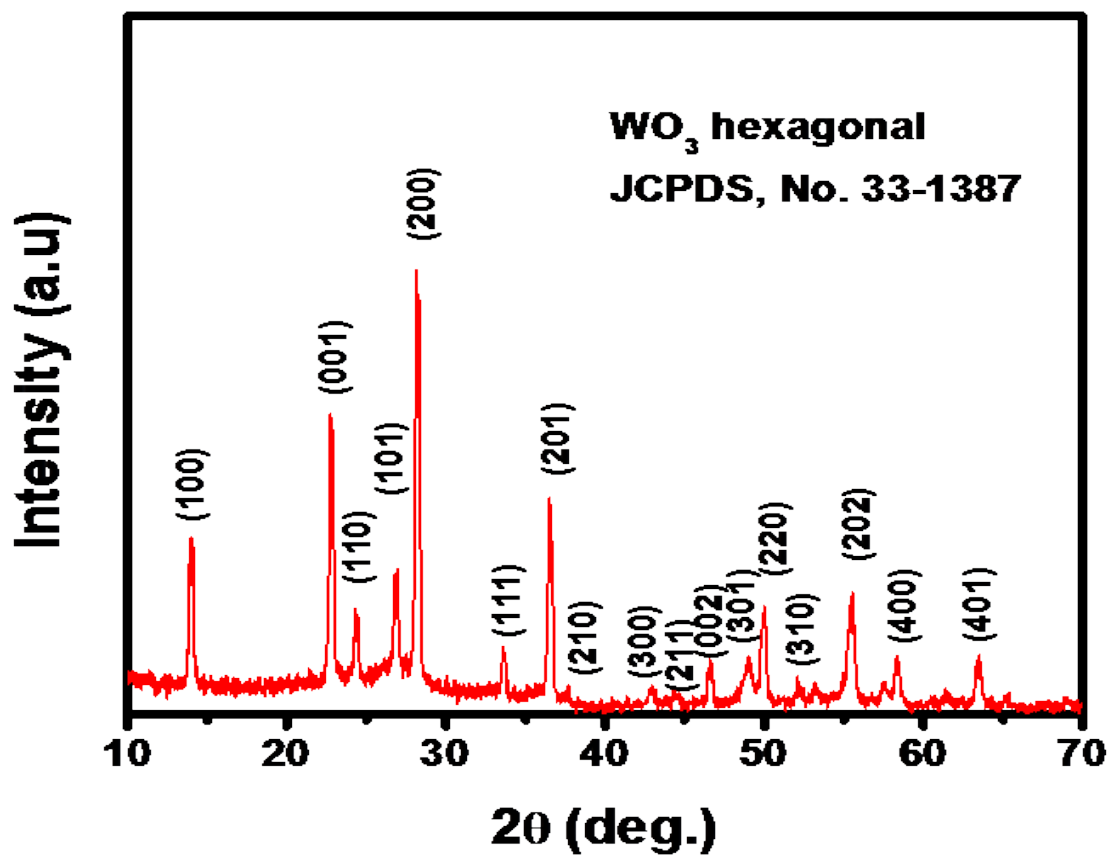

**Figure S4.** EDS analysis of the fabricated tungsten oxide: composition estimated from the EDS confirmed the  $\text{WO}_{2.9}$

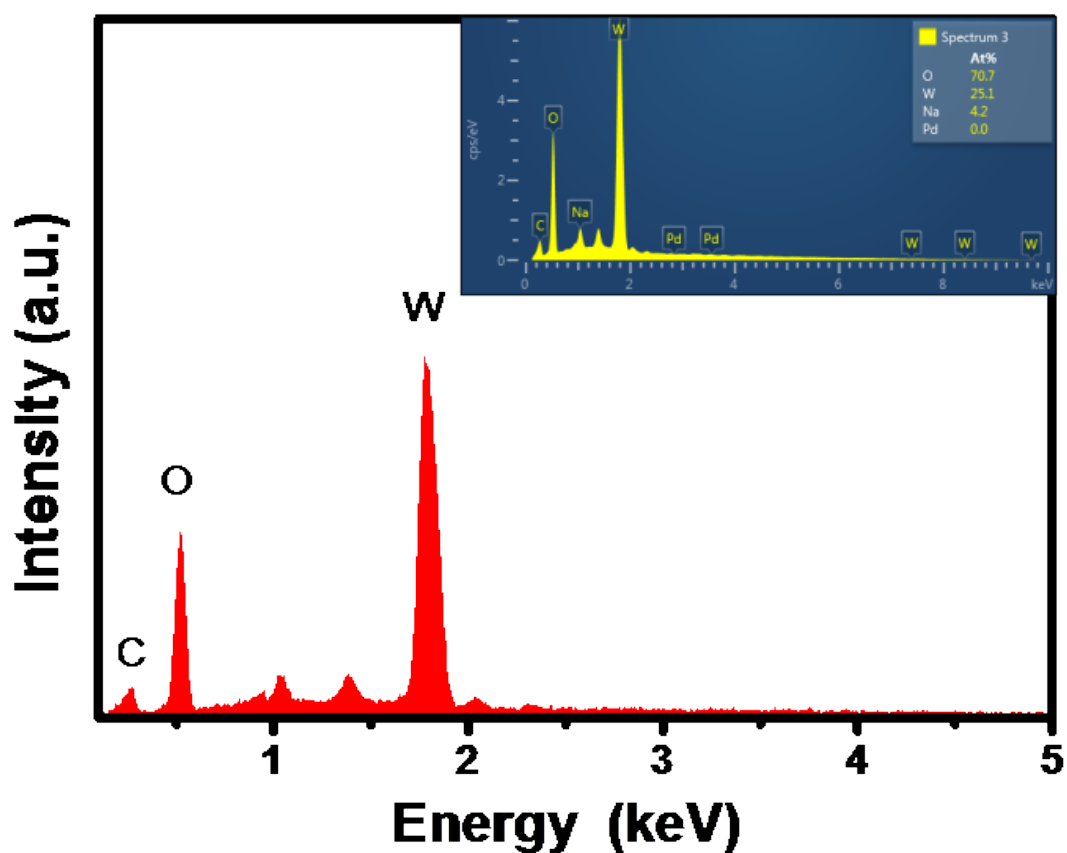

**Figure S5.** Raman spectra of the synthesized of the micro-wheels made of self-assembled tungsten oxide nanorods

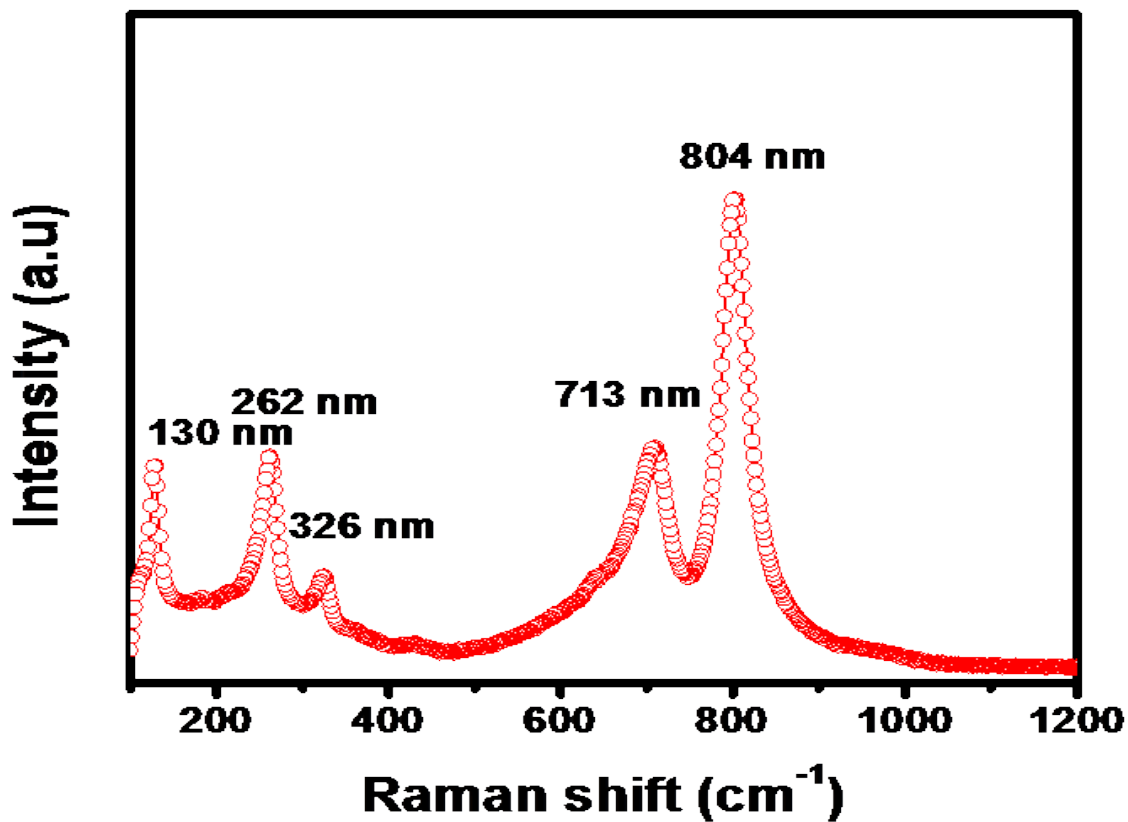

**Figure S6.** Photoluminescence (PL) spectrum of synthesized micro-wheels made of self-assembled tungsten oxide nanorods

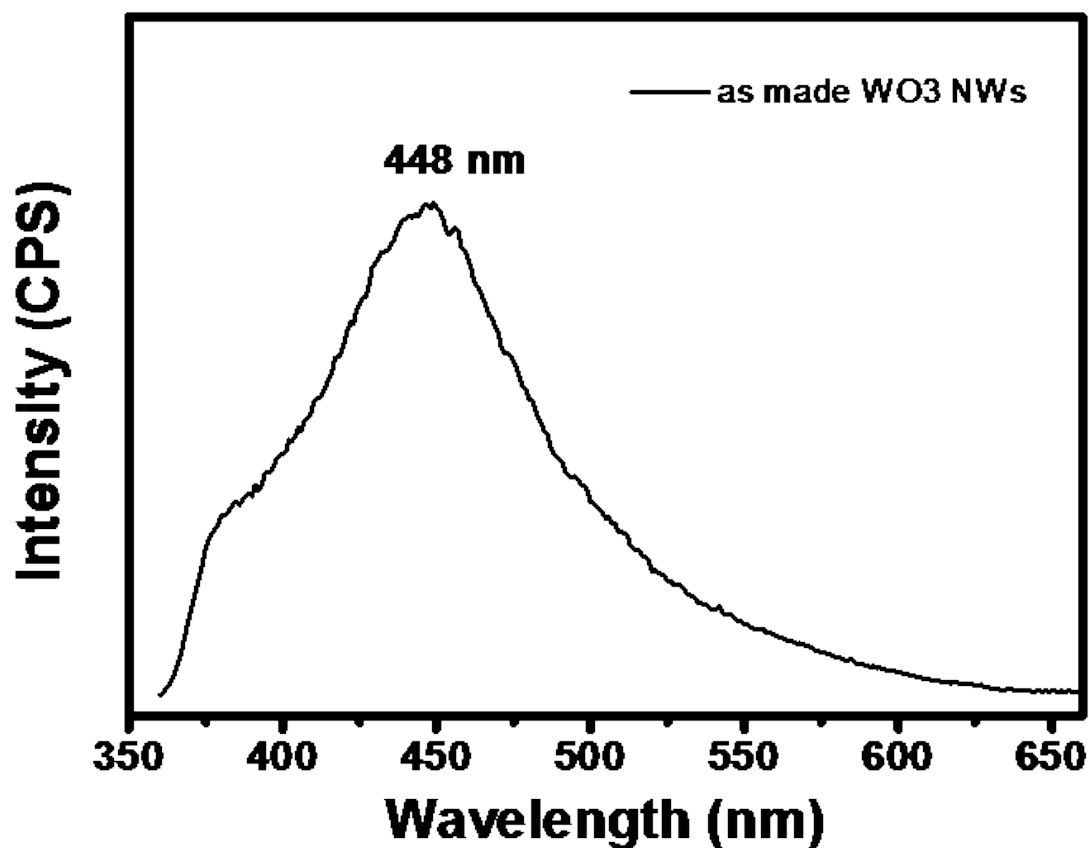

**Figure S7. :** Transient resistance vs. time of the nanosensor upon exposure to different concentration of  $\text{NH}_3$  measured at different temperatures

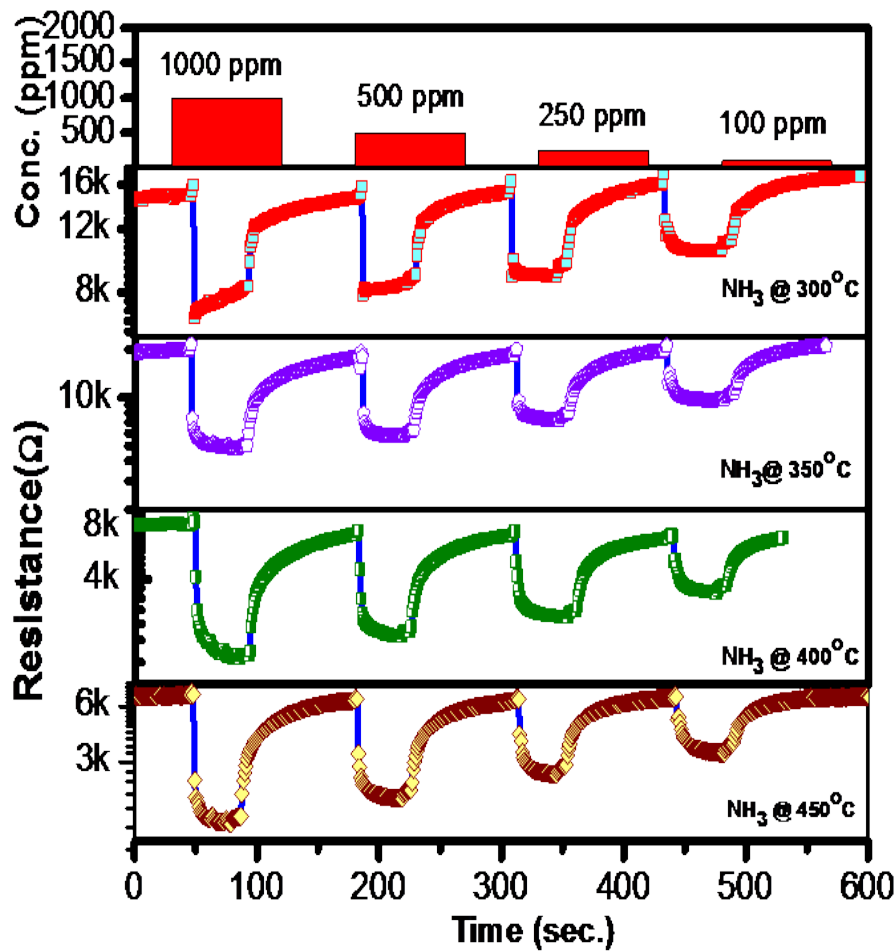



**Figure S8.** : (A) sensor response as a function of temperatures; (B) sensor response as a function of NH<sub>3</sub> measured at different temperatures

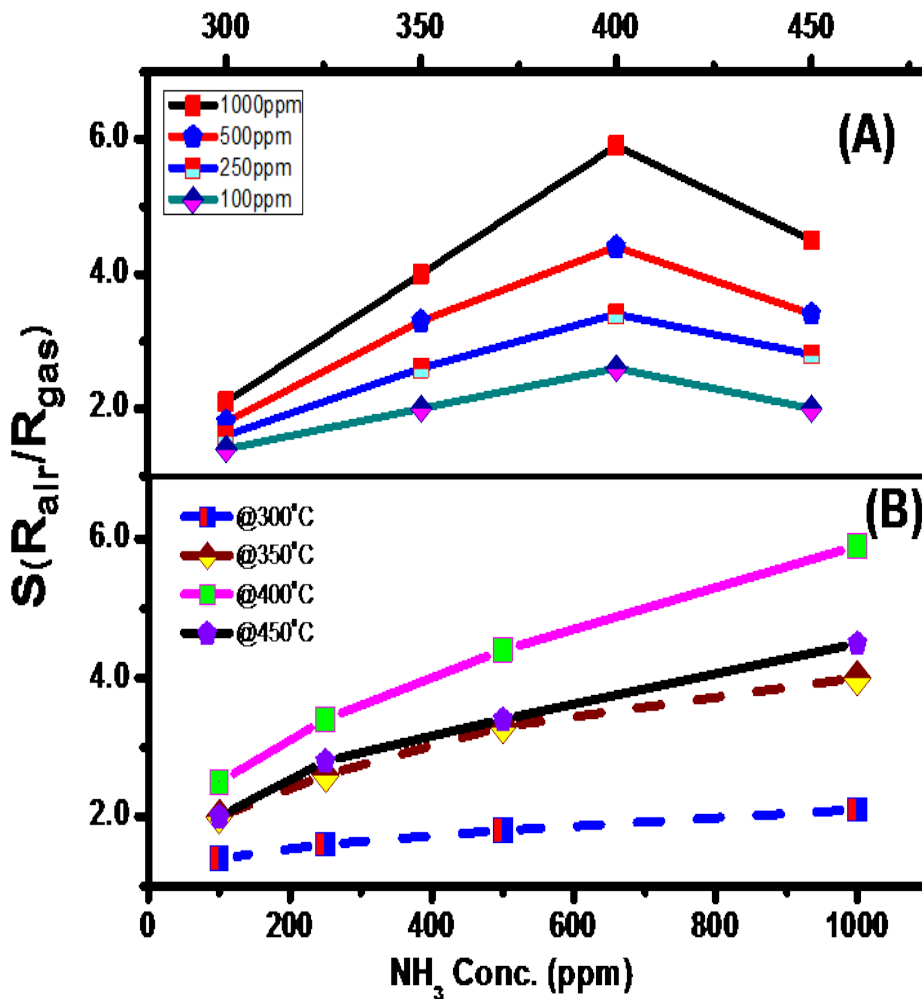

**Figure S9.** Light response of the sensor measured at different temperatures

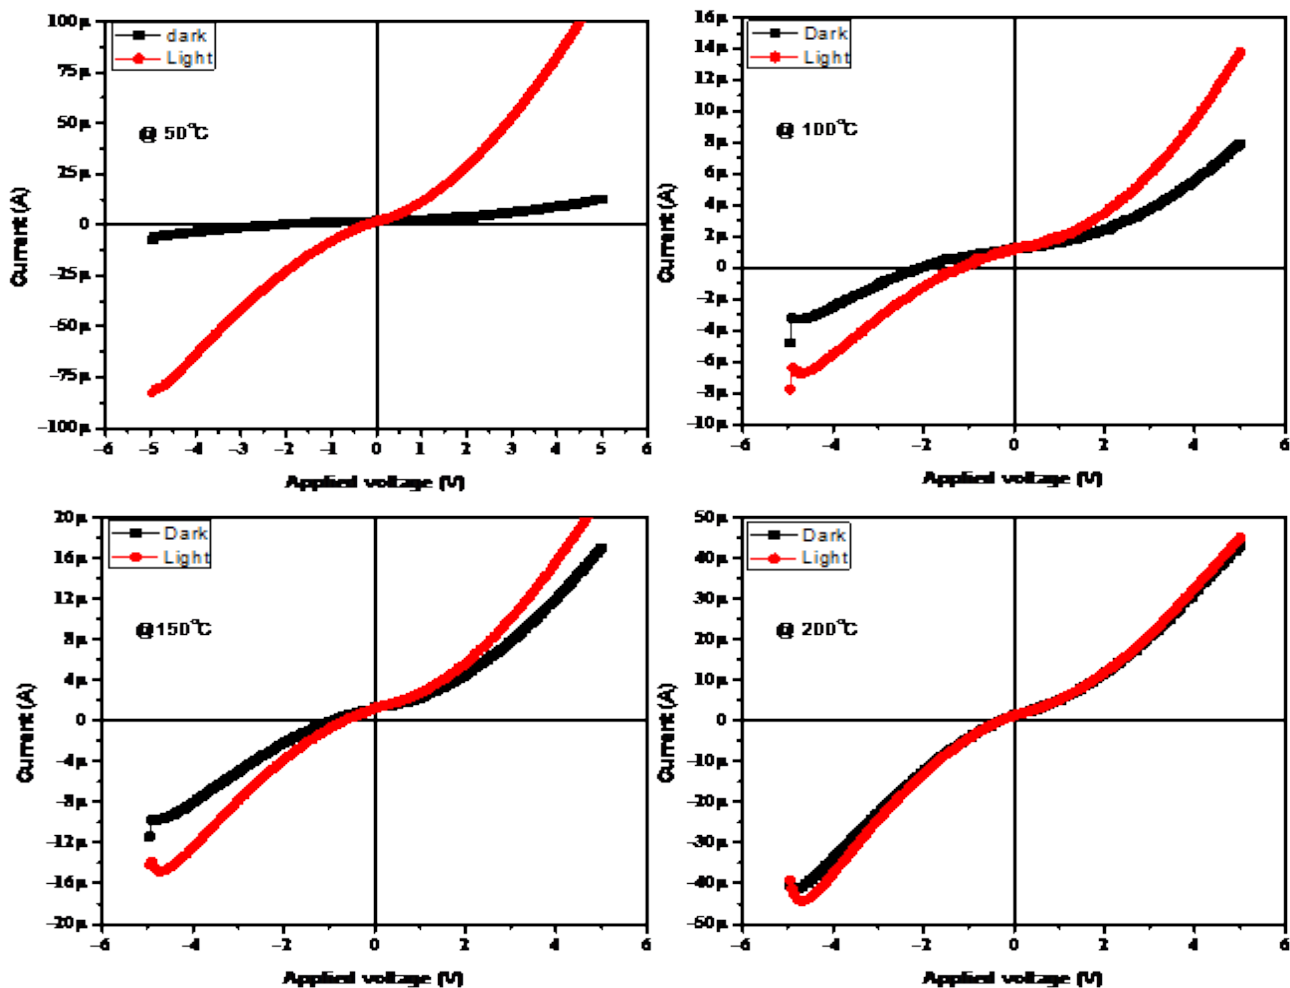

**Figure S10.** Transient resistance vs. time of the sensor measured at 150°C

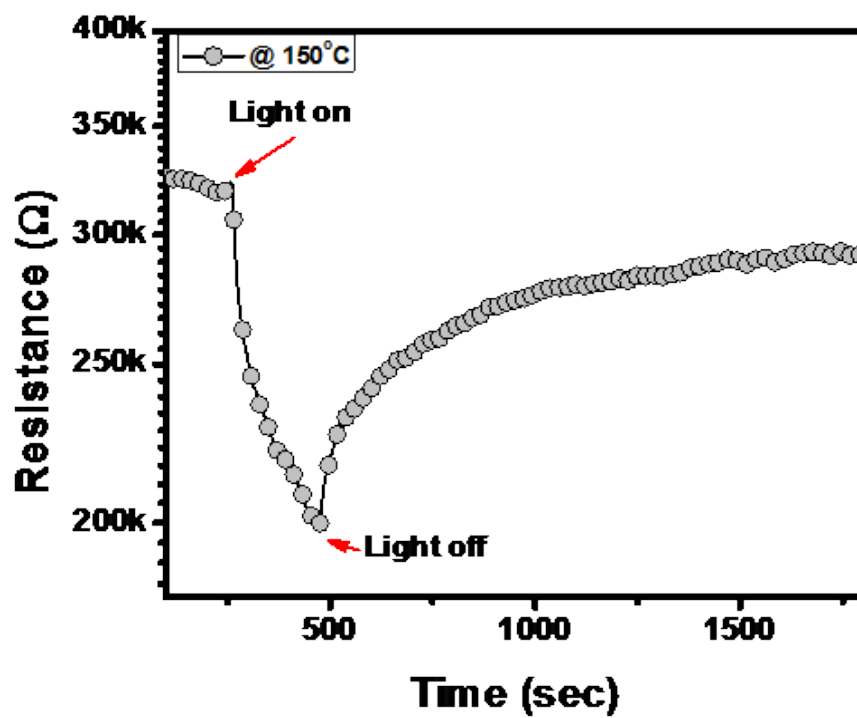

Supplement: c5ra00916b1.pdf [file c5ra00916b1.pdf]
